# Supplementary material for: Curcumin Confers Anti-Inflammatory Effects in Adults Who Recovered from COVID-19 and Were Subsequently Vaccinated: A Randomized Controlled Trial
Source: MDPI journal article supplement (doi:10.3390/nu15071548), 2023-03-23
Supplement: s1 [file s1]

**Table S1.** Nutrient intakes from 24-hour Dietary Recalls at baseline and week four for the CURC and CON groups.

|                   | Baseline |                   |        |                   | Week 4 |                   |        |                   | <i>P</i> <sup>1</sup> |
|-------------------|----------|-------------------|--------|-------------------|--------|-------------------|--------|-------------------|-----------------------|
|                   | CURC     |                   | CON    |                   | CURC   |                   | CON    |                   |                       |
| Calories (kcal)   | 1861     | (1393.0 , 2593.4) | 1923   | (1508.9 , 2137.9) | 1638   | (1271.7 , 2295.6) | 1418   | (1062.6 , 1999.7) | 0.57                  |
| Protein (g)       | 76.6     | (60.5 , 100.3)    | 72.9   | (61.5 , 87.3)     | 75.6   | (70.2 , 102.6)    | 63.8   | (42.9 , 90.3)     | 0.52                  |
| Carbohydrate (g)  | 192.7    | (172.3 , 235.3)   | 211.8  | (170.6 , 239.2)   | 173.4  | (145.0 , 256.4)   | 149.6  | (122.6 , 238.0)   | 0.44                  |
| Sugar (g)         | 46.5     | (33.2 , 72.2)     | 66.5   | (52.0 , 99.2)     | 55.2   | (50.6 , 71.4)     | 41.1   | (25.8 , 60.7)     | 0.08                  |
| Fat (g)           | 78.3     | (57.9 , 126.0)    | 82.2   | (64.4 , 94.9)     | 70.3   | (45.8 , 96.9)     | 55.4   | (39.1 , 71.0)     | 0.89                  |
| Saturated Fat (g) | 27.6     | (13.9 , 33.3)     | 25.3   | (15.1 , 33.8)     | 19.3   | (9.2 , 29.8)      | 16.8   | (11.5 , 19.7)     | 0.47                  |
| Cholesterol (mg)  | 205.4    | (85.0 , 528.8)    | 204.6  | (152.7 , 332.3)   | 165.4  | (89.0 , 314.2)    | 141.6  | (99.2 , 350.2)    | 0.87                  |
| Calcium (mg)      | 647.0    | (516.7 , 1006.7)  | 825.4  | (624.2 , 1121.3)  | 714.3  | (487.8 , 1167.7)  | 761.2  | (467.4 , 883.8)   | 0.44                  |
| Iron (mg)         | 10.5     | (9.1 , 15.0)      | 11.7   | (7.8 , 15.4)      | 11.7   | (9.0 , 13.5)      | 8.9    | (7.6 , 15.0)      | 0.54                  |
| Potassium (mg)    | 1259.0   | (906.2 , 2708.2)  | 1676.5 | (1418.2 , 2469.0) | 2200.3 | (1310.1 , 2395.4) | 1670.8 | (1106.9 , 2280.6) | 0.36                  |
| Sodium (mg)       | 2897.6   | (2125.1 , 4035.2) | 3002.8 | (2646.7 , 3785.4) | 2697.8 | (1878.4 , 3705.6) | 2791.3 | (2024.2 , 3797.9) | 0.55                  |

Data are medians (IQR). <sup>1</sup>*P*-value is derived from Mann Whitney U test for change data between groups. Change data calculated as post-pre values.

**Table S2.** Status of circulating inflammatory cytokines and chemokines in serum by treatment group at baseline and week 4

|                     | Baseline       |                | Week 4         |                 |
|---------------------|----------------|----------------|----------------|-----------------|
|                     | CURC           | CON            | CURC           | CON             |
| Ferritin (ng/mL)    | 70.07 ± 47.00  | 68.75 ± 55.73  | 66.43 ± 44.27  | 63.50 ± 61.38   |
| hsCRP (mg/L)        | 1.26 ± 1.55    | 1.99 ± 2.33    | 1.25 ± 1.52    | 2.56 ± 2.68     |
| NLR                 | 1.82 ± 0.66    | 1.70 ± 0.64    | 2.40 ± 0.99    | 2.06 ± 1.16     |
| GM-CSF (pg/mL)      | 5.20 ± 10.88   | 0.45 ± 1.65    | 16.13 ± 36.60  | 7.60 ± 14.98    |
| IFN-γ (pg/mL)       | 2.83 ± 3.71    | 1.35 ± 1.55    | 5.08 ± 7.57    | 2.64 ± 3.06     |
| IL-1β (pg/mL)       | 26.62 ± 34.18  | 11.69 ± 19.02  | 22.99 ± 25.84  | 19.09 ± 25.77   |
| IL-1Ra (pg/mL)      | 7.04 ± 5.36    | 4.38 ± 2.65    | 7.40 ± 3.92    | 6.82 ± 6.35     |
| IL-2 (pg/mL)        | 1.09 ± 0.89    | 0.30 ± 0.27    | 1.34 ± 1.48    | 0.90 ± 1.67     |
| IL-4 (pg/mL)        | 1.07 ± 1.13    | 0.59 ± 0.43    | 1.88 ± 3.03    | 1.02 ± 1.11     |
| IL-5 (pg/mL)        | 2.61 ± 2.31    | 3.29 ± 3.40    | 3.57 ± 3.15    | 4.96 ± 6.09     |
| IL-6 (pg/mL)        | 0.85 ± 0.88    | 0.76 ± 0.52    | 0.96 ± 0.84    | 1.22 ± 0.82     |
| IL-8 (pg/mL)        | 5.12 ± 2.68    | 5.16 ± 3.26    | 6.23 ± 2.50    | 6.19 ± 3.77     |
| IL-10 (pg/mL)       | 0.51 ± 1.30    | 1.89 ± 4.11    | 0.62 ± 1.61    | 2.76 ± 4.51     |
| IL-12p40 (pg/mL)    | 49.02 ± 29.03  | 48.79 ± 18.35  | 44.62 ± 28.28  | 65.80 ± 48.22   |
| IL-12p70 (pg/mL)    | 4.29 ± 5.74    | 1.28 ± 2.05    | 6.50 ± 8.06    | 3.99 ± 7.18     |
| IL-13 (pg/mL)       | 66.65 ± 68.61  | 29.59 ± 21.72  | 97.21 ± 118.01 | 44.87 ± 41.25   |
| MCP-1 (pg/mL)       | 204.48 ± 77.86 | 215.90 ± 54.60 | 217.05 ± 88.50 | 267.40 ± 157.76 |
| TNF-α (pg/mL)       | 29.28 ± 24.39  | 18.98 ± 7.05   | 42.09 ± 47.95  | 27.46 ± 14.65   |
| sICAM-1 (ng/mL)     | 383.29 ± 59.37 | 422.40 ± 86.53 | 413.49 ± 58.27 | 434.17 ± 77.48  |
| sP-selectin (ng/mL) | 62.17 ± 18.97  | 62.93 ± 18.32  | 60.20 ± 22.94  | 60.23 ± 15.70   |

Data are means ± SD
